# Supplementary material
Source: MDPI journal article supplement (https://www.mdpi.com/2072-4292/12/8/1312)
Supplement: s1 [file s1]

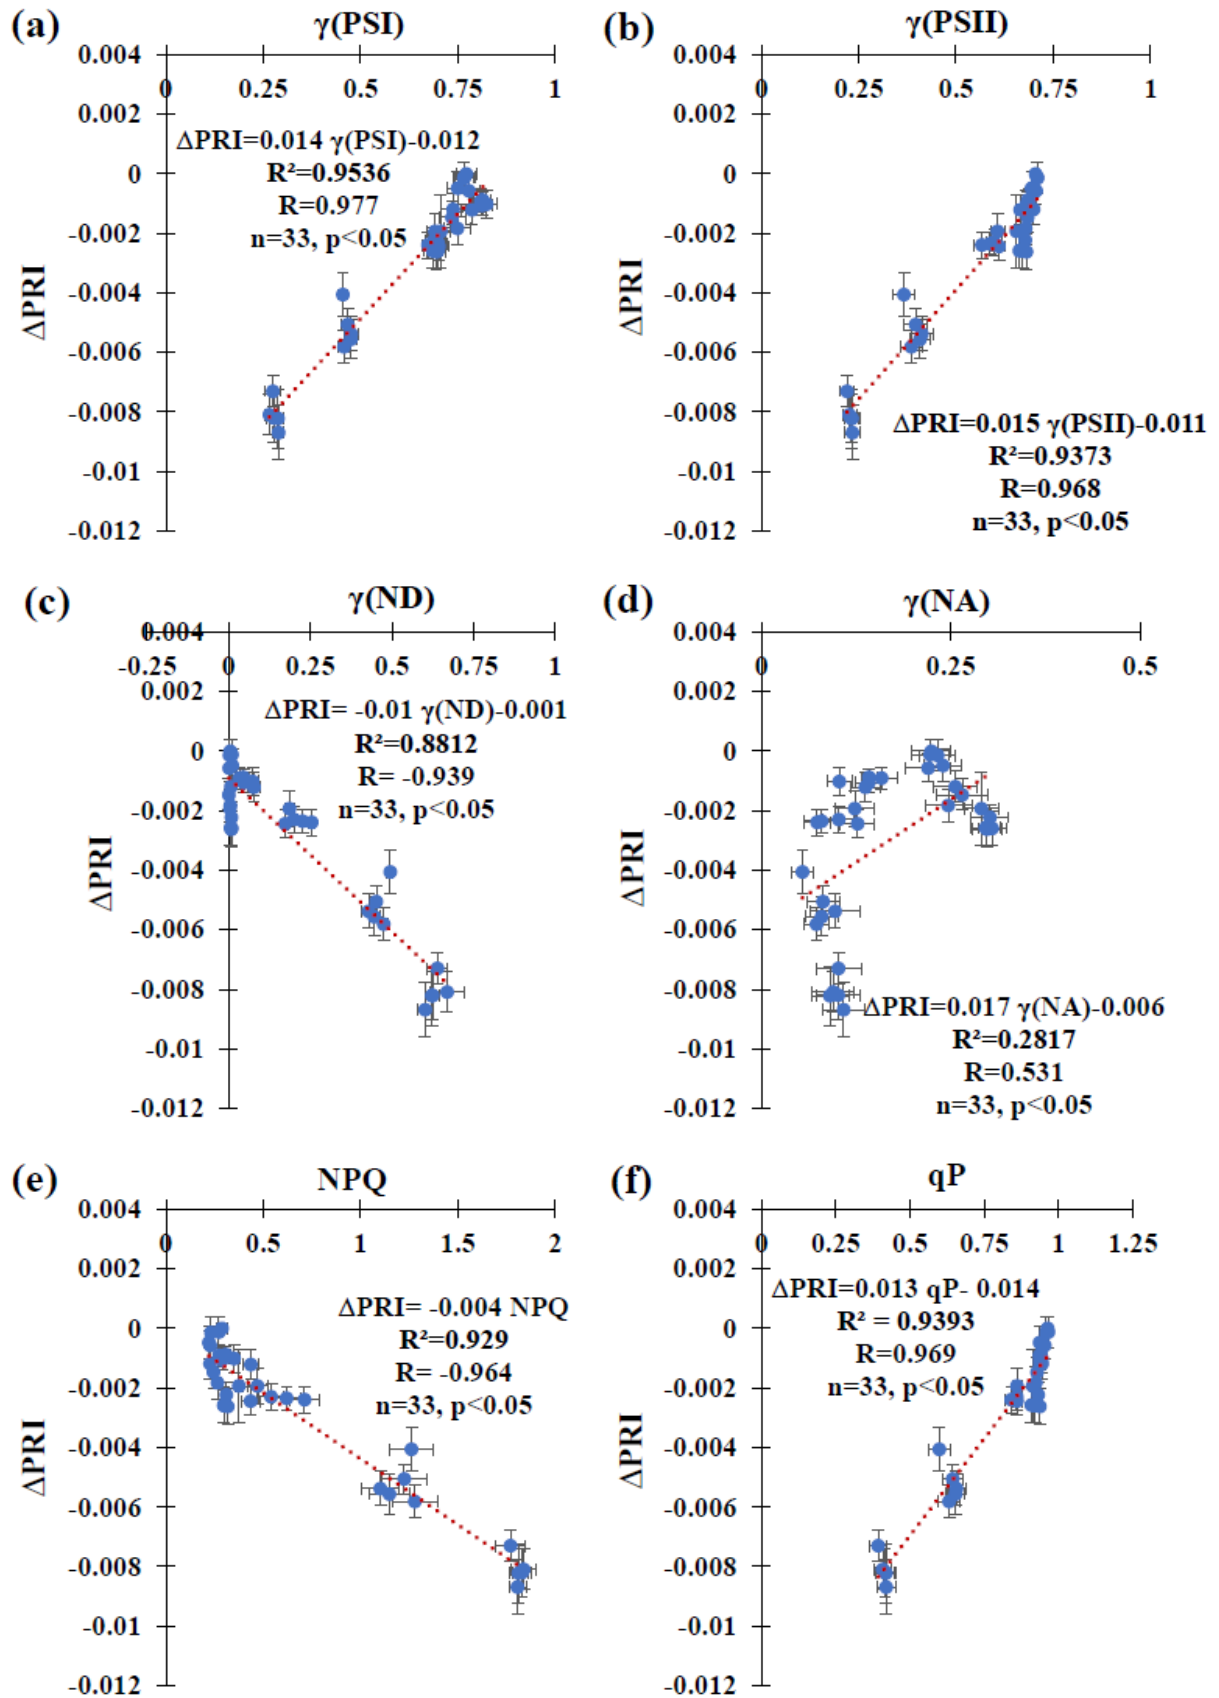

**Figure S5.** The scatter plot between values of  $\Delta PRI(545, 570)$  and photosynthetic parameters including  $\gamma(PSI)$  (a),  $\gamma(PSII)$  (b),  $\gamma(ND)$  (c),  $\gamma(NA)$  (d), NPQ (e), and qP (f), which were measured under combination of “light” (under the actinic light with different intensities) and “dark” (without actinic light) conditions ( $n=33$ ). R was the linear correlation coefficient. The coefficients were calculated on basis of results from Figures 2 and 3.
