# Supplementary material
Source: MDPI journal article supplement (https://www.mdpi.com/2072-4292/12/8/1312)
Supplement: s1 [file s1]

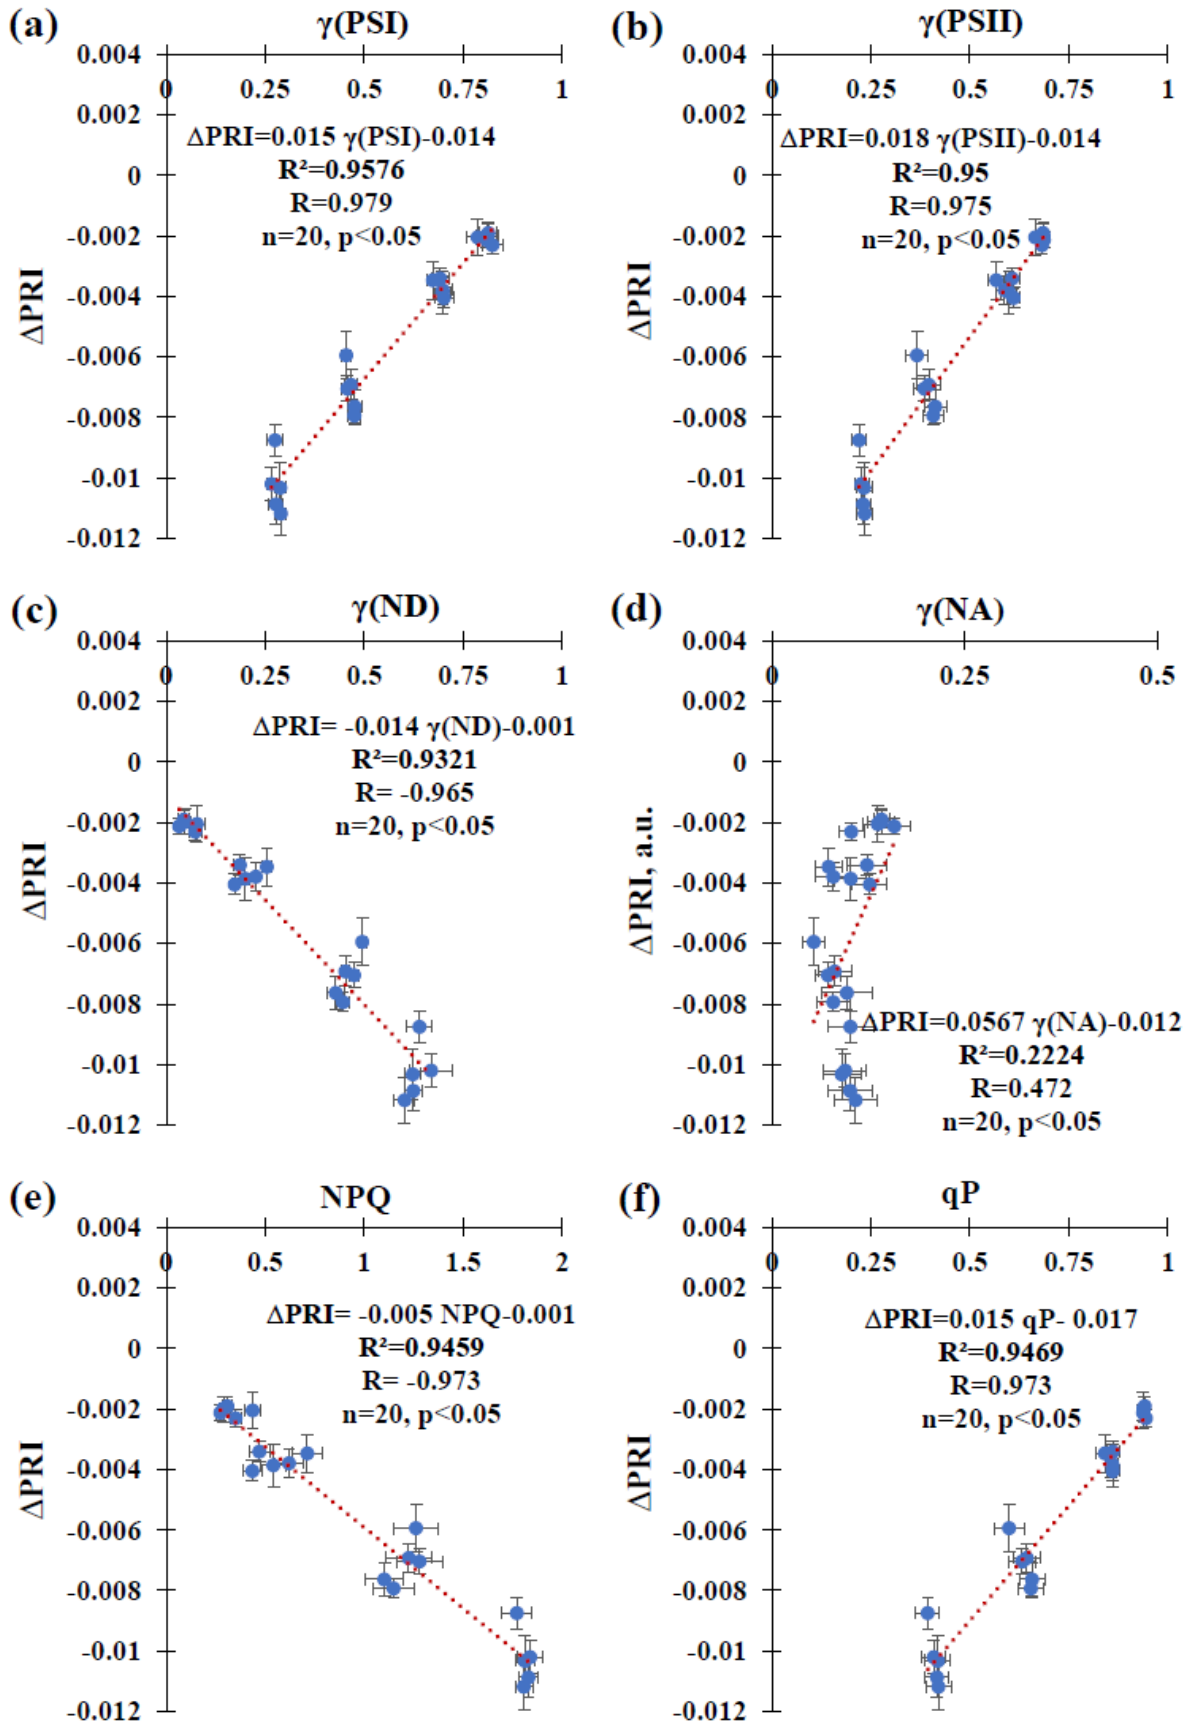

**Figure S9.** The scatter plot between values of  $\Delta\text{PRI}(531, 570)$  and photosynthetic parameters including  $\gamma(\text{PSI})$  (a),  $\gamma(\text{PSII})$  (b),  $\gamma(\text{ND})$  (c),  $\gamma(\text{NA})$  (d), NPQ (e), and qP (f), which were measured under “light” conditions (under the actinic light with different intensities) ( $n=20$ ).  $R$  was the linear correlation coefficient. The coefficients were calculated on basis of results from Figures 2 and 3.
